# Supplementary material for: In vivo delivery of plasmid DNA by lipid nanoparticles: the influence of ionizable cationic lipids on organ-selective gene expression
Source: Royal Society of Chemistry journal article supplement (doi:10.1039/d2bm00168c), 2022-01-01
Supplement: d2bm00168c1.pdf [file d2bm00168c1.pdf]

## Supporting Information to

### ***In vivo* delivery of plasmid DNA by lipid nanoparticles: the influence of ionizable cationic lipids on organ-selective gene expression**

Azizah Algarni<sup>1</sup>, Emily H. Pilkington<sup>1</sup>, Estelle J. A. Suys<sup>1</sup>, Hareth Al-Wassiti<sup>1</sup>, Colin W. Pouton<sup>1,\*</sup> and Nghia P. Truong<sup>1,\*</sup>

<sup>1</sup> *Department of Drug Delivery, Disposition and Dynamics, Monash Institute of Pharmaceutical Sciences, Monash University, Melbourne, VIC 3052, Australia*

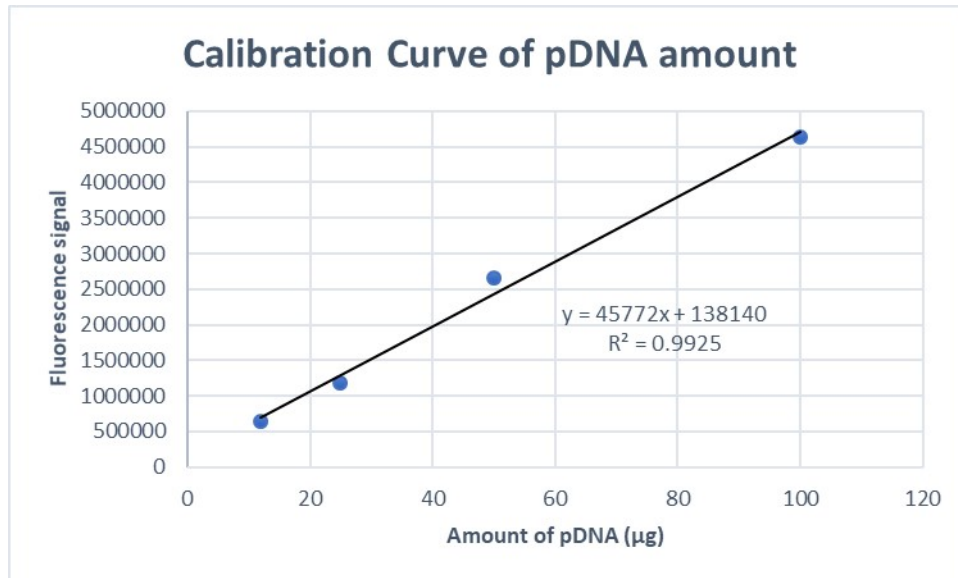

Figure S1: pDNA calibration curve for quantifying the amount of pDNA release used in a model endosome escape assay.

Table S1. DNA release data used for characterizing endosome escape.

| LNPs         | pH 5.5  |         |         |                                | pH 7.4 |        |        |                                | Normalised pDNA ( $\mu\text{g}$ ) |
|--------------|---------|---------|---------|--------------------------------|--------|--------|--------|--------------------------------|-----------------------------------|
|              | Well 1  | Well 2  | Well 3  | Average pDNA ( $\mu\text{g}$ ) | Well 1 | Well 2 | Well 3 | Average pDNA ( $\mu\text{g}$ ) |                                   |
| DODAP        | 818235  | 924716  | 831596  | 15.7                           | 911757 | 765569 | 779916 | 14.9                           | 0.9                               |
| DLin-MC3-DMA | 1002148 | 1142357 | 1105145 | 20.6                           | 369077 | 335467 | 310735 | 4.4                            | 16.3                              |
| DLin-KC2-DMA | 2022236 | 1801152 | 2072839 | 38.7                           | 291778 | 306796 | 293450 | 3.5                            | 35.3                              |

## A) Administration of LNPs

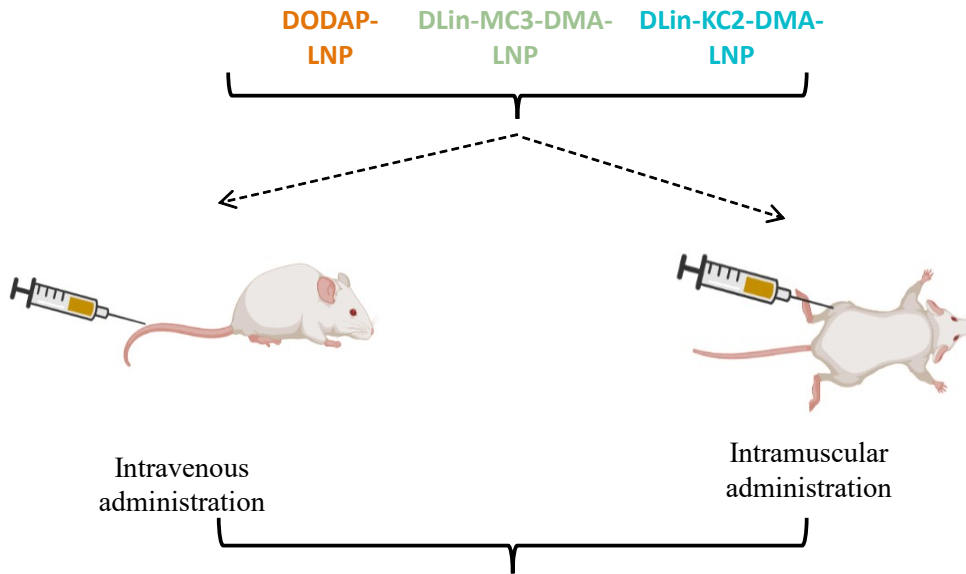

## B) Luminescence quantification and imaging

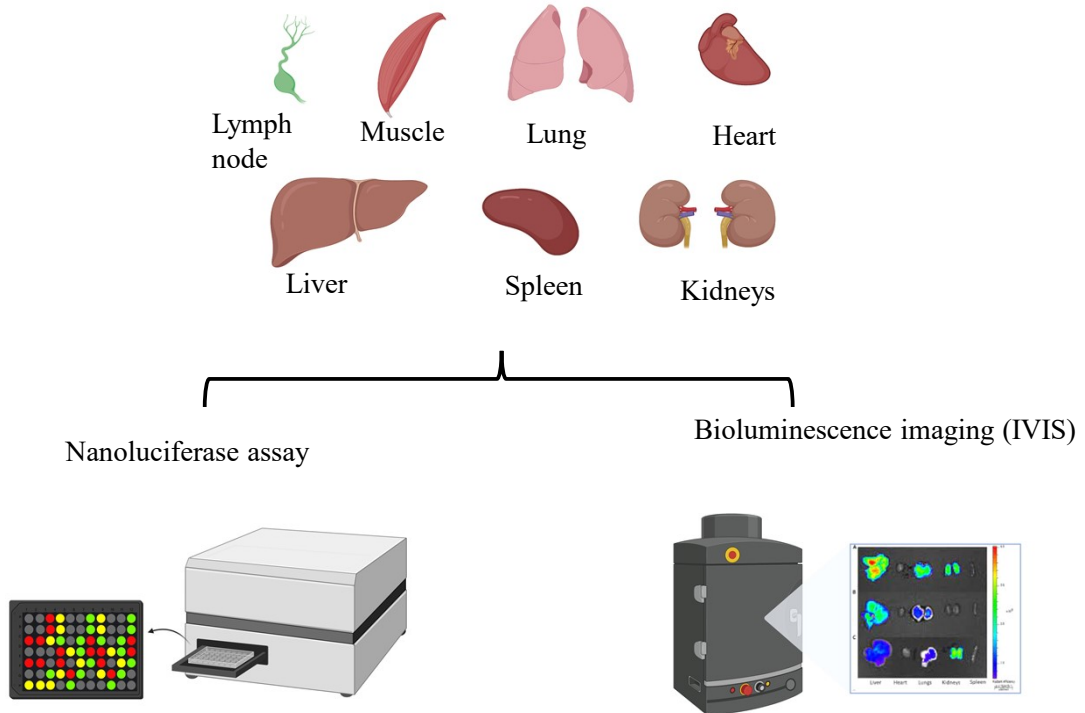

Figure S2. Schematic of lipid nanoparticles (LNPs) encapsulating Nanoluciferase encoding plasmid (pNL 1.1 CMV) for *in vivo* delivery screening. (A) Different LNP formulations were administered intravenously and intramuscularly to Balb/c mice. (B) Organs were harvested 24 h post-injection, and nLuc plasmid delivery and expression were quantified using both Nanoluciferase assay and whole-organ luminescence imaging.

Table S2. Physicochemical properties and encapsulation efficiency of pDNA LNPs.

| N/P ratio | <b>DODAP</b>          |            |                |            |
|-----------|-----------------------|------------|----------------|------------|
|           | <b>Mean size (nm)</b> | <b>PDI</b> | <b>ZP (mV)</b> | <b>EE%</b> |
| <b>3</b>  | 176 ± 17              | 0.2 ± 0.1  | -36.9 ± 4      | 54 ± 10    |
| <b>6</b>  | 122.4 ± 2.4           | 0.1 ± 0.02 | -13.5 ± 3      | 97 ± 2     |
| <b>9</b>  | 113.6 ± 3             | 0.1 ± 0.03 | -10 ± 4        | 95 ± 4     |
|           |                       |            |                |            |
|           | <b>DLin-MC3-DMA</b>   |            |                |            |
|           | <b>Mean size (nm)</b> | <b>PDI</b> | <b>ZP (mV)</b> | <b>EE%</b> |
| <b>3</b>  | 156 ± 12              | 0.3 ± 0.1  | -34.6 ± 5      | 55 ± 3.2   |
| <b>6</b>  | 135 ± 1.5             | 0.1 ± 0.03 | -12 ± 5        | 97 ± 2     |
| <b>9</b>  | 123.9 ± 3             | 0.1 ± 0.05 | -9 ± 3.7       | 97 ± 3     |
|           |                       |            |                |            |
|           | <b>DLin-KC2-DMA</b>   |            |                |            |
|           | <b>Mean size (nm)</b> | <b>PDI</b> | <b>ZP (mV)</b> | <b>EE%</b> |
| <b>3</b>  | 166.8 ± 19            | 0.5 ± 0.1  | -27 ± 4        | 77 ± 7.3   |
| <b>6</b>  | 120.4 ± 5             | 0.1 ± 0.02 | -13.9 ± 3      | 95 ± 5     |
| <b>9</b>  | 104.9 ± 3             | 0.1 ± 0.02 | -7 ± 3         | 94 ± 4     |

Table S3. Nano luciferase protein expression/mg of tissues following IM administration of nLuc pDNA LNPs.

|                | <b>DODAP</b>  |           | <b>DLin-MC3-DMA</b> |           | <b>DLin-KC2-DMA</b> |           |
|----------------|---------------|-----------|---------------------|-----------|---------------------|-----------|
|                | <b>RLU/mg</b> | <b>SD</b> | <b>RLU/mg</b>       | <b>SD</b> | <b>RLU/mg</b>       | <b>SD</b> |
| <b>DLN</b>     | 6809          | 1278      | 94761               | 17345     | 132350              | 74969     |
| <b>non-DLN</b> | 1705          | 1838      | 14297               | 3903      | 79637               | 13277     |
| <b>Muscle</b>  | 240776        | 44265     | 307453              | 56326     | 691888              | 64440     |
| <b>Heart</b>   | 704           | 330       | 1070                | 133       | 3550                | 3338      |
| <b>Lung</b>    | 372           | 47        | 361                 | 39        | 3745                | 2974      |
| <b>Liver</b>   | 3296          | 1037      | 3296                | 3514      | 13782               | 11933     |
| <b>Spleen</b>  | 437           | 47        | 5315                | 2000      | 22050               | 13047     |
| <b>Kidneys</b> | 805           | 283       | 1761                | 407       | 12525               | 6658      |

Table S4. Nano luciferase protein expression/mg of tissues following IV administration of nLuc pDNA LNPs

|                            | <b>DODAP</b>  |           | <b>DLin-MC3-DMA</b> |           | <b>DLin-KC2-DMA</b> |           |
|----------------------------|---------------|-----------|---------------------|-----------|---------------------|-----------|
|                            | <b>RLU/mg</b> | <b>SD</b> | <b>RLU/mg</b>       | <b>SD</b> | <b>RLU/mg</b>       | <b>SD</b> |
| <b>Inguinal Lymph Node</b> | 629           | 234       | 1035                | 458       | 12623               | 2280      |
| <b>Heart</b>               | 472           | 180       | 2304                | 740       | 3353                | 1632      |
| <b>Lung</b>                | 546           | 284       | 785                 | 239       | 245                 | 243       |
| <b>Liver</b>               | 11935         | 8246      | 5936                | 4226      | 37260               | 16332     |
| <b>Spleen</b>              | 5023          | 3887      | 24357               | 9804      | 69827               | 10536     |
| <b>kidney</b>              | 607           | 240       | 4091                | 1553      | 8627                | 1886      |
